# Supplementary material for: Assembly and Annotation of Transcriptome Provided Evidence of miRNA Mobility between Wheat and Wheat Stem Sawfly
Source: Front Plant Sci. 2017 Sep 26;8:1653. doi: 10.3389/fpls.2017.01653 (PMC5630980; doi:10.3389/fpls.2017.01653)
Supplement: TABLE S4 — List of putative miRNAs identified in the assembly of WSS transcriptome. [file Data_Sheet_4.XLSX]

## Sheet: SUmirScreen
Screen	index	Unique Hit ID	New miRNA ID	New miRNA Sequence	New miRNA Length	Conserved miRNA ID	Conserved miRNA Sequence	Conserved miRNA Mismatch	Sequence ID	Mature Start	Mature End	miRNA* Start	miRNA* End	miRNA* Sequence	Hairpin Location	Pre-miRNA Length	Pre-miRNA MFE	Pre-miRNA GC%	Pre-miRNA MFEI	Pre-miRNA Start	Pre-miRNA Sequence	mirna* Sequence
OK	1	1_c56368_g2_i1	candidate-miR277	UAAAUGCACUAUCUGGUACGACA	23	ame-miR277	UAAAUGCACUAUCUGGUACGACA	0	c56368_g2_i1	59	81	21	42	UCGUGCCAGAUGCGCGUUUACA	3'	101	-38.6	514851485148515	0.742307692307692	242	AAAAAGUGGGCAGUUGGGGCUCGUGCCAGAUGCGCGUUUACACGGGCCCUGAAUACUGUAAAUGCACUAUCUGGUACGACAUCUCUUCUGUCACUGUCACC
OK	2	6_c106582_g1_i1	candidate-miR14-3p	UCAGUCUUUUUCUCUCUCCUA	21	bmo-miR14-3p	UCAGUCUUUUUCUCUCUCCUA	0	c106582_g1_i1	58	78	21	42	GGGGUGAGAAAUGGACUCGGCU	3'	98	-42.7	489795918367347	0.889583333333333	52	UUUCGGUCGCUGGGUCAGUGGGGGUGAGAAAUGGACUCGGCUAUAUUUAUGUAACAGUCAGUCUUUUUCUCUCUCCUAUCGGCCCUACGGCAUAUCGU
Dicer	3	11_c47854_g1_i5	candidate-bantam-5p	CUGGUUUUCACAAUGAUUUGACA	23	bmo-bantam-5p	CUGGUUUUCAUAAUGAUUUGACA	1	c47854_g1_i5	21	43	0	2	0AC	5'	100	-33.1	38	0.871052631578947	18	ACUUGGCAGCAUAGACGAAACUGGUUUUCACAAUGAUUUGACAGAUGGAUAUGAUUCUGAGAUCAUUGUGAAAGCUGAUUUUGUUCAGAGAUCAUCUCGU
Dicer	4	12_c47854_g1_i4	candidate-bantam-5p	CUGGUUUUCACAAUGAUUUGACA	23	bmo-bantam-5p	CUGGUUUUCAUAAUGAUUUGACA	1	c47854_g1_i4	21	43	0	2	0AC	5'	100	-33.1	38	0.871052631578947	18	ACUUGGCAGCAUAGACGAAACUGGUUUUCACAAUGAUUUGACAGAUGGAUAUGAUUCUGAGAUCAUUGUGAAAGCUGAUUUUGUUCAGAGAUCAUCUCGU
Dicer	5	13_c47854_g1_i2	candidate-bantam-5p	CUGGUUUUCACAAUGAUUUGACA	23	bmo-bantam-5p	CUGGUUUUCAUAAUGAUUUGACA	1	c47854_g1_i2	21	43	0	2	0AC	5'	100	-33.1	38	0.871052631578947	18	ACUUGGCAGCAUAGACGAAACUGGUUUUCACAAUGAUUUGACAGAUGGAUAUGAUUCUGAGAUCAUUGUGAAAGCUGAUUUUGUUCAGAGAUCAUCUCGU
Dicer	6	14_c47854_g1_i1	candidate-bantam-5p	CUGGUUUUCACAAUGAUUUGACA	23	bmo-bantam-5p	CUGGUUUUCAUAAUGAUUUGACA	1	c47854_g1_i1	21	43	0	2	0AC	5'	100	-33.1	38	0.871052631578947	18	ACUUGGCAGCAUAGACGAAACUGGUUUUCACAAUGAUUUGACAGAUGGAUAUGAUUCUGAGAUCAUUGUGAAAGCUGAUUUUGUUCAGAGAUCAUCUCGU
OK	7	15_c46526_g1_i1	candidate-miR10-5p	ACCCUGUAGAUCCGAAUUUGU	21	bmo-miR10-5p	ACCCUGUAGAUCCGAAUUUGU	0	c46526_g1_i1	21	41	57	78	AAAUUCGGUUCUAGAGAGGUUU	5'	94	-37.9	414893617021277	0.971794871794872	88	CCAGUUAAUGCUCUACAUCUACCCUGUAGAUCCGAAUUUGUUUGAUAAGAGGCGACAAAUUCGGUUCUAGAGAGGUUUGUGUGGUGCAUACAAU
OK	8	16_c39545_g1_i5	candidate-miR281-3p	ACUGUCAUGGAGUUGCUCUCUU	22	bmo-miR281-3p	ACUGUCAUGGAGUUGCUCUCUU	0	c39545_g1_i5	56	77	21	42	GAGAGCUAUCCAUCGACAGUAU	3'	97	-47.8	463917525773196	106222222222222	245	AAAAAGGCGAGCGCUACGAAGAGAGCUAUCCAUCGACAGUAUGGUAAUGAUUGACACUGUCAUGGAGUUGCUCUCUUUGUGGACGCCGCUUAAUACA
OK	9	17_c39545_g1_i3	candidate-miR281-3p	ACUGUCAUGGAGUUGCUCUCUU	22	bmo-miR281-3p	ACUGUCAUGGAGUUGCUCUCUU	0	c39545_g1_i3	56	77	21	42	GAGAGCUAUCCAUCGACAGUAU	3'	97	-47.8	463917525773196	106222222222222	245	AAAAAGGCGAGCGCUACGAAGAGAGCUAUCCAUCGACAGUAUGGUAAUGAUUGACACUGUCAUGGAGUUGCUCUCUUUGUGGACGCCGCUUAAUACA
OK	10	18_c39545_g1_i1	candidate-miR281-3p	ACUGUCAUGGAGUUGCUCUCUU	22	bmo-miR281-3p	ACUGUCAUGGAGUUGCUCUCUU	0	c39545_g1_i1	56	77	21	42	GAGAGCUAUCCAUCGACAGUAU	3'	97	-47.8	463917525773196	106222222222222	245	AAAAAGGCGAGCGCUACGAAGAGAGCUAUCCAUCGACAGUAUGGUAAUGAUUGACACUGUCAUGGAGUUGCUCUCUUUGUGGACGCCGCUUAAUACA
OK	11	19_c37926_g1_i1	candidate-miR281-3p	ACUGUCAUGGAGUUGCUCUCUU	22	bmo-miR281-3p	ACUGUCAUGGAGUUGCUCUCUU	0	c37926_g1_i1	56	77	21	42	GAGAGCUAUCCAUCGACAGUAU	3'	97	-47.8	463917525773196	106222222222222	245	AAAAAGGCGAGCGCUACGAAGAGAGCUAUCCAUCGACAGUAUGGUAAUGAUUGACACUGUCAUGGAGUUGCUCUCUUUGUGGACGCCGCUUAAUACA
OK	12	20_c39545_g1_i5	candidate-miR281-5p	AAGAGAGCUAUCCAUCGACAGU	22	bmo-miR281-5p	AAGAGAGCUAUCCGUCGACAGU	1	c39545_g1_i5	21	42	60	81	UGUCAUGGAGUUGCUCUCUUUG	5'	101	-47.8	465346534653465	101702127659574	280	GAAAAAAGGCGAGCGCUACGAAGAGAGCUAUCCAUCGACAGUAUGGUAAUGAUUGACACUGUCAUGGAGUUGCUCUCUUUGUGGACGCCGCUUAAUACAAC
OK	13	21_c39545_g1_i3	candidate-miR281-5p	AAGAGAGCUAUCCAUCGACAGU	22	bmo-miR281-5p	AAGAGAGCUAUCCGUCGACAGU	1	c39545_g1_i3	21	42	60	81	UGUCAUGGAGUUGCUCUCUUUG	5'	101	-47.8	465346534653465	101702127659574	280	GAAAAAAGGCGAGCGCUACGAAGAGAGCUAUCCAUCGACAGUAUGGUAAUGAUUGACACUGUCAUGGAGUUGCUCUCUUUGUGGACGCCGCUUAAUACAAC
OK	14	22_c39545_g1_i1	candidate-miR281-5p	AAGAGAGCUAUCCAUCGACAGU	22	bmo-miR281-5p	AAGAGAGCUAUCCGUCGACAGU	1	c39545_g1_i1	21	42	60	81	UGUCAUGGAGUUGCUCUCUUUG	5'	101	-47.8	465346534653465	101702127659574	280	GAAAAAAGGCGAGCGCUACGAAGAGAGCUAUCCAUCGACAGUAUGGUAAUGAUUGACACUGUCAUGGAGUUGCUCUCUUUGUGGACGCCGCUUAAUACAAC
OK	15	23_c37926_g1_i1	candidate-miR281-5p	AAGAGAGCUAUCCAUCGACAGU	22	bmo-miR281-5p	AAGAGAGCUAUCCGUCGACAGU	1	c37926_g1_i1	21	42	60	81	UGUCAUGGAGUUGCUCUCUUUG	5'	101	-47.8	465346534653465	101702127659574	280	GAAAAAAGGCGAGCGCUACGAAGAGAGCUAUCCAUCGACAGUAUGGUAAUGAUUGACACUGUCAUGGAGUUGCUCUCUUUGUGGACGCCGCUUAAUACAAC
OK	16	24_c8144_g1_i1	candidate-miR8-5p	CAUCUUACCGGGCAGCAUUAGA	22	bmo-miR8-5p	CAUCUUACCGGGCAGCAUUAGA	0	c8144_g1_i1	21	42	59	81	UAAUACUGUCAGGUAAAGAUGUC	5'	97	-33.1	402061855670103	0.848717948717949	280	UCGGAAGGAGUAUCUGUUCACAUCUUACCGGGCAGCAUUAGAUUAAAGUUGAAUCUUCUAAUACUGUCAGGUAAAGAUGUCGUCAGGAUUCCGAAAU
OK	17	27_c8144_g1_i1	candidate-miR8-3p	UAAUACUGUCAGGUAAAGAUGUC	23	bmo-miR8-3p	UAAUACUGUCAGGUAAAGAUGUC	0	c8144_g1_i1	59	81	21	42	CAUCUUACCGGGCAGCAUUAGA	3'	101	-33.1	405940594059406	0.807317073170732	242	UCGGAAGGAGUAUCUGUUCACAUCUUACCGGGCAGCAUUAGAUUAAAGUUGAAUCUUCUAAUACUGUCAGGUAAAGAUGUCGUCAGGAUUCCGAAAUCAAC
Dicer	18	32_c48474_g2_i1	candidate-miR9a-5p	UCUUUGGUUAUCUAGCUGUAUGA	23	bmo-miR9a-5p	UCUUUGGUUAUCUAGCUGUAUGA	0	c48474_g2_i1	21	43	56	2		5'	98	-42	418367346938776	102439024390244	280	AAGGAGAUGCCGUUGUCCUGUCUUUGGUUAUCUAGCUGUAUGACUGUUUUAUCUCAUAAAGCUAAAUUACCGAAGUCAGGACGAUGGUAACGCAUCGA
Dicer	19	33_c45075_g1_i3	candidate-miR9a-5p	UCUUUGGUUAUCUAGCUGUAUGA	23	bmo-miR9a-5p	UCUUUGGUUAUCUAGCUGUAUGA	0	c45075_g1_i3	21	43	56	2		5'	98	-42	418367346938776	102439024390244	13	AAGGAGAUGCCGUUGUCCUGUCUUUGGUUAUCUAGCUGUAUGACUGUUUUAUCUCAUAAAGCUAAAUUACCGAAGUCAGGACGAUGGUAACGCAUCGA
OK	20	36_c56368_g2_i1	candidate-miR277-3p	UAAAUGCACUAUCUGGUACGACA	23	bmo-miR277-3p	UAAAUGCACUAUCUGGUACGACA	0	c56368_g2_i1	59	81	21	42	UCGUGCCAGAUGCGCGUUUACA	3'	101	-38.6	514851485148515	0.742307692307692	242	AAAAAGUGGGCAGUUGGGGCUCGUGCCAGAUGCGCGUUUACACGGGCCCUGAAUACUGUAAAUGCACUAUCUGGUACGACAUCUCUUCUGUCACUGUCACC
OK	21	39_c69998_g1_i1	candidate-miR2a-3p	UAUCACAGCCAGCUUUGAUGAGC	23	bmo-miR2a-3p	UAUCACAGCCAGCUUUGAUGAGC	0	c69998_g1_i1	57	79	21	41	UCACAAAGUGGCUGUUGUAUG	3'	99	-43.1	525252525252525	0.828846153846154	159	AGAGUCGGUGUGCGCGCUGCUCACAAAGUGGCUGUUGUAUGCAGAUUUUCGAGUCAUAUCACAGCCAGCUUUGAUGAGCGACGCGACAUCCCAGCAUCA
OK	22	40_c8144_g1_i1	candidate-miR8-5p	CAUCUUACCGGGCAGCAUUAGA	22	cqu-miR8-5p	CAUCUUACCGGGCAGCAUUAGA	0	c8144_g1_i1	21	42	59	81	UAAUACUGUCAGGUAAAGAUGUC	5'	97	-33.1	402061855670103	0.848717948717949	280	UCGGAAGGAGUAUCUGUUCACAUCUUACCGGGCAGCAUUAGAUUAAAGUUGAAUCUUCUAAUACUGUCAGGUAAAGAUGUCGUCAGGAUUCCGAAAU
OK	23	41_c47854_g1_i5	candidate-bantam-3p	UGAGAUCAUUGUGAAAGCUGA	21	cqu-bantam-3p	UGAGAUCAUUUUGAAAGCUGA	1	c47854_g1_i5	56	76	21	43	GGUUUUCACAAUGAUUUGACAGA	3'	96	-31.6	37.5	0.877777777777778	20	UUGGCAGCAUAGACGAAACUGGUUUUCACAAUGAUUUGACAGAUGGAUAUGAUUCUGAGAUCAUUGUGAAAGCUGAUUUUGUUCAGAGAUCAUCUC
OK	24	42_c47854_g1_i4	candidate-bantam-3p	UGAGAUCAUUGUGAAAGCUGA	21	cqu-bantam-3p	UGAGAUCAUUUUGAAAGCUGA	1	c47854_g1_i4	56	76	21	43	GGUUUUCACAAUGAUUUGACAGA	3'	96	-31.6	37.5	0.877777777777778	20	UUGGCAGCAUAGACGAAACUGGUUUUCACAAUGAUUUGACAGAUGGAUAUGAUUCUGAGAUCAUUGUGAAAGCUGAUUUUGUUCAGAGAUCAUCUC
OK	25	43_c47854_g1_i2	candidate-bantam-3p	UGAGAUCAUUGUGAAAGCUGA	21	cqu-bantam-3p	UGAGAUCAUUUUGAAAGCUGA	1	c47854_g1_i2	56	76	21	43	GGUUUUCACAAUGAUUUGACAGA	3'	96	-31.6	37.5	0.877777777777778	20	UUGGCAGCAUAGACGAAACUGGUUUUCACAAUGAUUUGACAGAUGGAUAUGAUUCUGAGAUCAUUGUGAAAGCUGAUUUUGUUCAGAGAUCAUCUC
OK	26	44_c47854_g1_i1	candidate-bantam-3p	UGAGAUCAUUGUGAAAGCUGA	21	cqu-bantam-3p	UGAGAUCAUUUUGAAAGCUGA	1	c47854_g1_i1	56	76	21	43	GGUUUUCACAAUGAUUUGACAGA	3'	96	-31.6	37.5	0.877777777777778	20	UUGGCAGCAUAGACGAAACUGGUUUUCACAAUGAUUUGACAGAUGGAUAUGAUUCUGAGAUCAUUGUGAAAGCUGAUUUUGUUCAGAGAUCAUCUC
OK	27	45_c70837_g1_i1	candidate-miR71-5p	UGAAAGACAUGGGUAGUGAGAU	22	cqu-miR71-5p	AGAAAGACAUGGGUAGUGAGAU	1	c70837_g1_i1	21	42	61	81	CUCACUACCUUGUCUUUCAUG	5'	101	-54.7	534653465346535	101296296296296	18	AUGCUGGGGUGAAUUCUGCGUGAAAGACAUGGGUAGUGAGAUGUCCUCGCGCACCUGCGUCUCACUACCUUGUCUUUCAUGCGGCGUUCGCUGAAGUCAAC
OK	28	46_c39545_g1_i5	candidate-miR281-5p	AAGAGAGCUAUCCAUCGACAGU	22	cqu-miR281-5p	AAGAGAGCUAUCCGUCGACAGU	1	c39545_g1_i5	21	42	60	81	UGUCAUGGAGUUGCUCUCUUUG	5'	101	-47.8	465346534653465	101702127659574	280	GAAAAAAGGCGAGCGCUACGAAGAGAGCUAUCCAUCGACAGUAUGGUAAUGAUUGACACUGUCAUGGAGUUGCUCUCUUUGUGGACGCCGCUUAAUACAAC
OK	29	47_c39545_g1_i3	candidate-miR281-5p	AAGAGAGCUAUCCAUCGACAGU	22	cqu-miR281-5p	AAGAGAGCUAUCCGUCGACAGU	1	c39545_g1_i3	21	42	60	81	UGUCAUGGAGUUGCUCUCUUUG	5'	101	-47.8	465346534653465	101702127659574	280	GAAAAAAGGCGAGCGCUACGAAGAGAGCUAUCCAUCGACAGUAUGGUAAUGAUUGACACUGUCAUGGAGUUGCUCUCUUUGUGGACGCCGCUUAAUACAAC
OK	30	48_c39545_g1_i1	candidate-miR281-5p	AAGAGAGCUAUCCAUCGACAGU	22	cqu-miR281-5p	AAGAGAGCUAUCCGUCGACAGU	1	c39545_g1_i1	21	42	60	81	UGUCAUGGAGUUGCUCUCUUUG	5'	101	-47.8	465346534653465	101702127659574	280	GAAAAAAGGCGAGCGCUACGAAGAGAGCUAUCCAUCGACAGUAUGGUAAUGAUUGACACUGUCAUGGAGUUGCUCUCUUUGUGGACGCCGCUUAAUACAAC
OK	31	49_c37926_g1_i1	candidate-miR281-5p	AAGAGAGCUAUCCAUCGACAGU	22	cqu-miR281-5p	AAGAGAGCUAUCCGUCGACAGU	1	c37926_g1_i1	21	42	60	81	UGUCAUGGAGUUGCUCUCUUUG	5'	101	-47.8	465346534653465	101702127659574	280	GAAAAAAGGCGAGCGCUACGAAGAGAGCUAUCCAUCGACAGUAUGGUAAUGAUUGACACUGUCAUGGAGUUGCUCUCUUUGUGGACGCCGCUUAAUACAAC
OK	32	51_c32014_g1_i1	candidate-miR279-3p	UGACUAGAUCCACACUCAUUAA	22	cqu-miR279-3p	UGACUAGAUCCACACUCAUUAA	0	c32014_g1_i1	54	75	16	38	AGUGAGUGCUGGUCUAGUGCACA	3'	95	-40.2	463157894736842	0.913636363636364	1	GUCCUGGUUGUGCCGAGUGAGUGCUGGUCUAGUGCACAUUGAAAUUGACUCUGUGACUAGAUCCACACUCAUUAAGCACGUUCAGGUGUAAACAA
OK	33	52_c39545_g1_i5	candidate-miR281-3p	UGUCAUGGAGUUGCUCUCUUU	21	cqu-miR281-3p	UGUCAUGGAAUUGCUCUCUUU	1	c39545_g1_i5	59	79	21	41	AGAGAGCUAUCCAUCGACAGU	3'	99	-47.8	454545454545455	106222222222222	242	AAAAAAGGCGAGCGCUACGAAGAGAGCUAUCCAUCGACAGUAUGGUAAUGAUUGACACUGUCAUGGAGUUGCUCUCUUUGUGGACGCCGCUUAAUACAA
OK	34	53_c39545_g1_i3	candidate-miR281-3p	UGUCAUGGAGUUGCUCUCUUU	21	cqu-miR281-3p	UGUCAUGGAAUUGCUCUCUUU	1	c39545_g1_i3	59	79	21	41	AGAGAGCUAUCCAUCGACAGU	3'	99	-47.8	454545454545455	106222222222222	242	AAAAAAGGCGAGCGCUACGAAGAGAGCUAUCCAUCGACAGUAUGGUAAUGAUUGACACUGUCAUGGAGUUGCUCUCUUUGUGGACGCCGCUUAAUACAA
OK	35	54_c39545_g1_i1	candidate-miR281-3p	UGUCAUGGAGUUGCUCUCUUU	21	cqu-miR281-3p	UGUCAUGGAAUUGCUCUCUUU	1	c39545_g1_i1	59	79	21	41	AGAGAGCUAUCCAUCGACAGU	3'	99	-47.8	454545454545455	106222222222222	242	AAAAAAGGCGAGCGCUACGAAGAGAGCUAUCCAUCGACAGUAUGGUAAUGAUUGACACUGUCAUGGAGUUGCUCUCUUUGUGGACGCCGCUUAAUACAA
OK	36	55_c37926_g1_i1	candidate-miR281-3p	UGUCAUGGAGUUGCUCUCUUU	21	cqu-miR281-3p	UGUCAUGGAAUUGCUCUCUUU	1	c37926_g1_i1	59	79	21	41	AGAGAGCUAUCCAUCGACAGU	3'	99	-47.8	454545454545455	106222222222222	242	AAAAAAGGCGAGCGCUACGAAGAGAGCUAUCCAUCGACAGUAUGGUAAUGAUUGACACUGUCAUGGAGUUGCUCUCUUUGUGGACGCCGCUUAAUACAA
OK	37	56_c8144_g1_i1	candidate-miR8-3p	UAAUACUGUCAGGUAAAGAUGU	22	cqu-miR8-3p	UAAUACUGUCAGGUAAAGAUGU	0	c8144_g1_i1	58	79	21	41	AUCUUACCGGGCAGCAUUAGA	3'	99	-33.1	404040404040404	0.8275	243	CGGAAGGAGUAUCUGUUCACAUCUUACCGGGCAGCAUUAGAUUAAAGUUGAAUCUUCUAAUACUGUCAGGUAAAGAUGUCGUCAGGAUUCCGAAAUCAA
OK	38	57_c46526_g1_i1	candidate-miR10-5p	ACCCUGUAGAUCCGAAUUUGUU	22	cqu-miR10-5p	ACCCUGUAGAUCCGAAUUUGUU	0	c46526_g1_i1	21	42	56	78	CAAAUUCGGUUCUAGAGAGGUUU	5'	94	-37.9	414893617021277	0.971794871794872	88	CCAGUUAAUGCUCUACAUCUACCCUGUAGAUCCGAAUUUGUUUGAUAAGAGGCGACAAAUUCGGUUCUAGAGAGGUUUGUGUGGUGCAUACAAU
OK	39	61_c106582_g1_i1	candidate-miR14-3p	UCAGUCUUUUUCUCUCUCCUAU	22	dme-miR14-3p	UCAGUCUUUUUCUCUCUCCUAU	0	c106582_g1_i1	59	80	21	43	GGGGGUGAGAAAUGGACUCGGCU	3'	100	-42.7	50	0.854	51	CUUUCGGUCGCUGGGUCAGUGGGGGUGAGAAAUGGACUCGGCUAUAUUUAUGUAACAGUCAGUCUUUUUCUCUCUCCUAUCGGCCCUACGGCAUAUCGUC
Dicer	40	63_c48474_g2_i1	candidate-miR9a-5p	UCUUUGGUUAUCUAGCUGUAUGA	23	dme-miR9a-5p	UCUUUGGUUAUCUAGCUGUAUGA	0	c48474_g2_i1	21	43	56	2		5'	98	-42	418367346938776	102439024390244	280	AAGGAGAUGCCGUUGUCCUGUCUUUGGUUAUCUAGCUGUAUGACUGUUUUAUCUCAUAAAGCUAAAUUACCGAAGUCAGGACGAUGGUAACGCAUCGA
Dicer	41	64_c45075_g1_i3	candidate-miR9a-5p	UCUUUGGUUAUCUAGCUGUAUGA	23	dme-miR9a-5p	UCUUUGGUUAUCUAGCUGUAUGA	0	c45075_g1_i3	21	43	56	2		5'	98	-42	418367346938776	102439024390244	13	AAGGAGAUGCCGUUGUCCUGUCUUUGGUUAUCUAGCUGUAUGACUGUUUUAUCUCAUAAAGCUAAAUUACCGAAGUCAGGACGAUGGUAACGCAUCGA
OK	42	67_c8144_g1_i1	candidate-miR8-5p	CAUCUUACCGGGCAGCAUUAGA	22	dme-miR8-5p	CAUCUUACCGGGCAGCAUUAGA	0	c8144_g1_i1	21	42	59	81	UAAUACUGUCAGGUAAAGAUGUC	5'	97	-33.1	402061855670103	0.848717948717949	280	UCGGAAGGAGUAUCUGUUCACAUCUUACCGGGCAGCAUUAGAUUAAAGUUGAAUCUUCUAAUACUGUCAGGUAAAGAUGUCGUCAGGAUUCCGAAAU
OK	43	76_c8144_g1_i1	candidate-miR8-3p	UAAUACUGUCAGGUAAAGAUGUC	23	dme-miR8-3p	UAAUACUGUCAGGUAAAGAUGUC	0	c8144_g1_i1	59	81	21	42	CAUCUUACCGGGCAGCAUUAGA	3'	101	-33.1	405940594059406	0.807317073170732	242	UCGGAAGGAGUAUCUGUUCACAUCUUACCGGGCAGCAUUAGAUUAAAGUUGAAUCUUCUAAUACUGUCAGGUAAAGAUGUCGUCAGGAUUCCGAAAUCAAC
OK	44	77_c39545_g1_i5	candidate-miR281-3p	UGUCAUGGAGUUGCUCUCUUUGU	23	dme-miR281-3p	UGUCAUGGAAUUGCUCUCUUUGU	1	c39545_g1_i5	61	83	21	43	GAAGAGAGCUAUCCAUCGACAGU	3'	103	-47.8	466019417475728	0.995833333333333	240	UGAAAAAAGGCGAGCGCUACGAAGAGAGCUAUCCAUCGACAGUAUGGUAAUGAUUGACACUGUCAUGGAGUUGCUCUCUUUGUGGACGCCGCUUAAUACAACG
OK	45	78_c39545_g1_i3	candidate-miR281-3p	UGUCAUGGAGUUGCUCUCUUUGU	23	dme-miR281-3p	UGUCAUGGAAUUGCUCUCUUUGU	1	c39545_g1_i3	61	83	21	43	GAAGAGAGCUAUCCAUCGACAGU	3'	103	-47.8	466019417475728	0.995833333333333	240	UGAAAAAAGGCGAGCGCUACGAAGAGAGCUAUCCAUCGACAGUAUGGUAAUGAUUGACACUGUCAUGGAGUUGCUCUCUUUGUGGACGCCGCUUAAUACAACG
OK	46	79_c39545_g1_i1	candidate-miR281-3p	UGUCAUGGAGUUGCUCUCUUUGU	23	dme-miR281-3p	UGUCAUGGAAUUGCUCUCUUUGU	1	c39545_g1_i1	61	83	21	43	GAAGAGAGCUAUCCAUCGACAGU	3'	103	-47.8	466019417475728	0.995833333333333	240	UGAAAAAAGGCGAGCGCUACGAAGAGAGCUAUCCAUCGACAGUAUGGUAAUGAUUGACACUGUCAUGGAGUUGCUCUCUUUGUGGACGCCGCUUAAUACAACG
OK	47	80_c37926_g1_i1	candidate-miR281-3p	UGUCAUGGAGUUGCUCUCUUUGU	23	dme-miR281-3p	UGUCAUGGAAUUGCUCUCUUUGU	1	c37926_g1_i1	61	83	21	43	GAAGAGAGCUAUCCAUCGACAGU	3'	103	-47.8	466019417475728	0.995833333333333	240	UGAAAAAAGGCGAGCGCUACGAAGAGAGCUAUCCAUCGACAGUAUGGUAAUGAUUGACACUGUCAUGGAGUUGCUCUCUUUGUGGACGCCGCUUAAUACAACG
OK	48	194_c69998_g1_i1	candidate-miR2b-3p	UAUCACAGCCAGCUUUGAUGAGC	23	dme-miR2b-3p	UAUCACAGCCAGCUUUGAGGAGC	1	c69998_g1_i1	57	79	21	41	UCACAAAGUGGCUGUUGUAUG	3'	99	-43.1	525252525252525	0.828846153846154	159	AGAGUCGGUGUGCGCGCUGCUCACAAAGUGGCUGUUGUAUGCAGAUUUUCGAGUCAUAUCACAGCCAGCUUUGAUGAGCGACGCGACAUCCCAGCAUCA
OK	49	202_c32014_g1_i1	candidate-miR279-3p	UGACUAGAUCCACACUCAUUAA	22	dme-miR279-3p	UGACUAGAUCCACACUCAUUAA	0	c32014_g1_i1	54	75	16	38	AGUGAGUGCUGGUCUAGUGCACA	3'	95	-40.2	463157894736842	0.913636363636364	1	GUCCUGGUUGUGCCGAGUGAGUGCUGGUCUAGUGCACAUUGAAAUUGACUCUGUGACUAGAUCCACACUCAUUAAGCACGUUCAGGUGUAAACAA
OK	50	204_c69998_g1_i1	candidate-miR2c-3p	UAUCACAGCCAGCUUUGAUGAGC	23	dme-miR2c-3p	UAUCACAGCCAGCUUUGAUGGGC	1	c69998_g1_i1	57	79	21	41	UCACAAAGUGGCUGUUGUAUG	3'	99	-43.1	525252525252525	0.828846153846154	159	AGAGUCGGUGUGCGCGCUGCUCACAAAGUGGCUGUUGUAUGCAGAUUUUCGAGUCAUAUCACAGCCAGCUUUGAUGAGCGACGCGACAUCCCAGCAUCA
OK	51	209_c56368_g2_i1	candidate-miR277-3p	UAAAUGCACUAUCUGGUACGACA	23	dme-miR277-3p	UAAAUGCACUAUCUGGUACGACA	0	c56368_g2_i1	59	81	21	42	UCGUGCCAGAUGCGCGUUUACA	3'	101	-38.6	514851485148515	0.742307692307692	242	AAAAAGUGGGCAGUUGGGGCUCGUGCCAGAUGCGCGUUUACACGGGCCCUGAAUACUGUAAAUGCACUAUCUGGUACGACAUCUCUUCUGUCACUGUCACC
OK	52	210_c39545_g1_i5	candidate-miR281-2-5p	AAGAGAGCUAUCCAUCGACAGU	22	dme-miR281-2-5p	AAGAGAGCUAUCCGUCGACAGU	1	c39545_g1_i5	21	42	60	81	UGUCAUGGAGUUGCUCUCUUUG	5'	101	-47.8	465346534653465	101702127659574	280	GAAAAAAGGCGAGCGCUACGAAGAGAGCUAUCCAUCGACAGUAUGGUAAUGAUUGACACUGUCAUGGAGUUGCUCUCUUUGUGGACGCCGCUUAAUACAAC
OK	53	211_c39545_g1_i3	candidate-miR281-2-5p	AAGAGAGCUAUCCAUCGACAGU	22	dme-miR281-2-5p	AAGAGAGCUAUCCGUCGACAGU	1	c39545_g1_i3	21	42	60	81	UGUCAUGGAGUUGCUCUCUUUG	5'	101	-47.8	465346534653465	101702127659574	280	GAAAAAAGGCGAGCGCUACGAAGAGAGCUAUCCAUCGACAGUAUGGUAAUGAUUGACACUGUCAUGGAGUUGCUCUCUUUGUGGACGCCGCUUAAUACAAC
OK	54	212_c39545_g1_i1	candidate-miR281-2-5p	AAGAGAGCUAUCCAUCGACAGU	22	dme-miR281-2-5p	AAGAGAGCUAUCCGUCGACAGU	1	c39545_g1_i1	21	42	60	81	UGUCAUGGAGUUGCUCUCUUUG	5'	101	-47.8	465346534653465	101702127659574	280	GAAAAAAGGCGAGCGCUACGAAGAGAGCUAUCCAUCGACAGUAUGGUAAUGAUUGACACUGUCAUGGAGUUGCUCUCUUUGUGGACGCCGCUUAAUACAAC
OK	55	213_c37926_g1_i1	candidate-miR281-2-5p	AAGAGAGCUAUCCAUCGACAGU	22	dme-miR281-2-5p	AAGAGAGCUAUCCGUCGACAGU	1	c37926_g1_i1	21	42	60	81	UGUCAUGGAGUUGCUCUCUUUG	5'	101	-47.8	465346534653465	101702127659574	280	GAAAAAAGGCGAGCGCUACGAAGAGAGCUAUCCAUCGACAGUAUGGUAAUGAUUGACACUGUCAUGGAGUUGCUCUCUUUGUGGACGCCGCUUAAUACAAC
OK	56	214_c52255_g1_i3	candidate-miR184-3p	UGGACGGAGAACUGAUAAGGGC	22	dme-miR184-3p	UGGACGGAGAACUGAUAAGGGC	0	c52255_g1_i3	62	83	21	42	CCUUAUCAUUCUCCUGUCCGGU	3'	103	-42	543689320388349	0.75	142	AGAAAUUCGUGCCCGAAGUCCCUUAUCAUUCUCCUGUCCGGUGUACGAGCGUUUAGACAACUGGACGGAGAACUGAUAAGGGCCCGAGGGUCGCAGACUCGAC
OK	57	215_c52255_g1_i2	candidate-miR184-3p	UGGACGGAGAACUGAUAAGGGC	22	dme-miR184-3p	UGGACGGAGAACUGAUAAGGGC	0	c52255_g1_i2	62	83	21	42	CCUUAUCAUUCUCCUGUCCGGU	3'	103	-42	543689320388349	0.75	186	AGAAAUUCGUGCCCGAAGUCCCUUAUCAUUCUCCUGUCCGGUGUACGAGCGUUUAGACAACUGGACGGAGAACUGAUAAGGGCCCGAGGGUCGCAGACUCGAC
OK	58	216_c52255_g1_i1	candidate-miR184-3p	UGGACGGAGAACUGAUAAGGGC	22	dme-miR184-3p	UGGACGGAGAACUGAUAAGGGC	0	c52255_g1_i1	62	83	21	42	CCUUAUCAUUCUCCUGUCCGGU	3'	103	-42	543689320388349	0.75	142	AGAAAUUCGUGCCCGAAGUCCCUUAUCAUUCUCCUGUCCGGUGUACGAGCGUUUAGACAACUGGACGGAGAACUGAUAAGGGCCCGAGGGUCGCAGACUCGAC
OK	59	217_c50769_g1_i2	candidate-miR184-3p	UGGACGGAGAACUGAUAAGGGC	22	dme-miR184-3p	UGGACGGAGAACUGAUAAGGGC	0	c50769_g1_i2	62	83	21	42	CCUUAUCAUUCUCCUGUCCGGU	3'	103	-42	543689320388349	0.75	239	AGAAAUUCGUGCCCGAAGUCCCUUAUCAUUCUCCUGUCCGGUGUACGAGCGUUUAGACAACUGGACGGAGAACUGAUAAGGGCCCGAGGGUCGCAGACUCGAC
OK	60	218_c50769_g1_i1	candidate-miR184-3p	UGGACGGAGAACUGAUAAGGGC	22	dme-miR184-3p	UGGACGGAGAACUGAUAAGGGC	0	c50769_g1_i1	62	83	21	42	CCUUAUCAUUCUCCUGUCCGGU	3'	103	-42	543689320388349	0.75	190	AGAAAUUCGUGCCCGAAGUCCCUUAUCAUUCUCCUGUCCGGUGUACGAGCGUUUAGACAACUGGACGGAGAACUGAUAAGGGCCCGAGGGUCGCAGACUCGAC
OK	61	220_c69998_g1_i1	candidate-miR2a-3p	UAUCACAGCCAGCUUUGAUGAGC	23	dme-miR2a-3p	UAUCACAGCCAGCUUUGAUGAGC	0	c69998_g1_i1	57	79	21	41	UCACAAAGUGGCUGUUGUAUG	3'	99	-43.1	525252525252525	0.828846153846154	159	AGAGUCGGUGUGCGCGCUGCUCACAAAGUGGCUGUUGUAUGCAGAUUUUCGAGUCAUAUCACAGCCAGCUUUGAUGAGCGACGCGACAUCCCAGCAUCA
OK	62	227_c46526_g1_i1	candidate-miR10-5p	ACCCUGUAGAUCCGAAUUUGUU	22	dme-miR10-5p	ACCCUGUAGAUCCGAAUUUGUU	0	c46526_g1_i1	21	42	56	78	CAAAUUCGGUUCUAGAGAGGUUU	5'	94	-37.9	414893617021277	0.971794871794872	88	CCAGUUAAUGCUCUACAUCUACCCUGUAGAUCCGAAUUUGUUUGAUAAGAGGCGACAAAUUCGGUUCUAGAGAGGUUUGUGUGGUGCAUACAAU
OK	63	231_c48274_g1_i2	candidate-miR87a-3p	GUGAGCAAAGUUUCAGGUGUG	21	tca-miR87a-3p	GUGAGCAAAGUUUCAGGUGUG	0	c48274_g1_i2	85	105	21	43	CGCCUGAAAUUUGCUUUUGACCU	3'	125	-45.2	46.4	0.779310344827586	216	CAUCCUGGGCUAUACUCUUACGCCUGAAAUUUGCUUUUGACCUGGCCAUACGUGCACUCGUUAAUUGAGUUUUAUUGCAAAAAGGUGAGCAAAGUUUCAGGUGUGUGAGGGCGCCUGGGCUACAA
OK	64	232_c48274_g1_i1	candidate-miR87a-3p	GUGAGCAAAGUUUCAGGUGUG	21	tca-miR87a-3p	GUGAGCAAAGUUUCAGGUGUG	0	c48274_g1_i1	85	105	21	43	CGCCUGAAAUUUGCUUUUGACCU	3'	125	-45.2	46.4	0.779310344827586	216	CAUCCUGGGCUAUACUCUUACGCCUGAAAUUUGCUUUUGACCUGGCCAUACGUGCACUCGUUAAUUGAGUUUUAUUGCAAAAAGGUGAGCAAAGUUUCAGGUGUGUGAGGGCGCCUGGGCUACAA
OK	65	234_c106582_g1_i1	candidate-miR14-3p	UCAGUCUUUUUCUCUCUCCUAU	22	tca-miR14-3p	UCAGUCUUUUUCUCUCUCCUAU	0	c106582_g1_i1	59	80	21	43	GGGGGUGAGAAAUGGACUCGGCU	3'	100	-42.7	50	0.854	51	CUUUCGGUCGCUGGGUCAGUGGGGGUGAGAAAUGGACUCGGCUAUAUUUAUGUAACAGUCAGUCUUUUUCUCUCUCCUAUCGGCCCUACGGCAUAUCGUC
Head	66	238_c56368_g2_i1	candidate-miR277-5p	CGUGCCAGAUGCGCGUUUACAC	22	tca-miR277-5p	CGUGCCAGAUGCGCGUUUACAC	0	c56368_g2_i1	21	42	57	79	GUAAAUGCACUAUCUGGUACGAC	5'	95	-38.6	515789473684211	0.787755102040816	280	AAAAGUGGGCAGUUGGGGCUCGUGCCAGAUGCGCGUUUACACGGGCCCUGAAUACUGUAAAUGCACUAUCUGGUACGACAUCUCUUCUGUCACUG
OK	67	239_c39545_g1_i5	candidate-miR281-5p	AAGAGAGCUAUCCAUCGACAGU	22	tca-miR281-5p	AAGAGAGCUAUCCGUCGACAGU	1	c39545_g1_i5	21	42	60	81	UGUCAUGGAGUUGCUCUCUUUG	5'	101	-47.8	465346534653465	101702127659574	280	GAAAAAAGGCGAGCGCUACGAAGAGAGCUAUCCAUCGACAGUAUGGUAAUGAUUGACACUGUCAUGGAGUUGCUCUCUUUGUGGACGCCGCUUAAUACAAC
OK	68	240_c39545_g1_i3	candidate-miR281-5p	AAGAGAGCUAUCCAUCGACAGU	22	tca-miR281-5p	AAGAGAGCUAUCCGUCGACAGU	1	c39545_g1_i3	21	42	60	81	UGUCAUGGAGUUGCUCUCUUUG	5'	101	-47.8	465346534653465	101702127659574	280	GAAAAAAGGCGAGCGCUACGAAGAGAGCUAUCCAUCGACAGUAUGGUAAUGAUUGACACUGUCAUGGAGUUGCUCUCUUUGUGGACGCCGCUUAAUACAAC
OK	69	241_c39545_g1_i1	candidate-miR281-5p	AAGAGAGCUAUCCAUCGACAGU	22	tca-miR281-5p	AAGAGAGCUAUCCGUCGACAGU	1	c39545_g1_i1	21	42	60	81	UGUCAUGGAGUUGCUCUCUUUG	5'	101	-47.8	465346534653465	101702127659574	280	GAAAAAAGGCGAGCGCUACGAAGAGAGCUAUCCAUCGACAGUAUGGUAAUGAUUGACACUGUCAUGGAGUUGCUCUCUUUGUGGACGCCGCUUAAUACAAC
OK	70	242_c37926_g1_i1	candidate-miR281-5p	AAGAGAGCUAUCCAUCGACAGU	22	tca-miR281-5p	AAGAGAGCUAUCCGUCGACAGU	1	c37926_g1_i1	21	42	60	81	UGUCAUGGAGUUGCUCUCUUUG	5'	101	-47.8	465346534653465	101702127659574	280	GAAAAAAGGCGAGCGCUACGAAGAGAGCUAUCCAUCGACAGUAUGGUAAUGAUUGACACUGUCAUGGAGUUGCUCUCUUUGUGGACGCCGCUUAAUACAAC
OK	71	243_c56368_g2_i1	candidate-miR277-3p	UAAAUGCACUAUCUGGUACGACA	23	tca-miR277-3p	UAAAUGCACUAUCUGGUACGACA	0	c56368_g2_i1	59	81	21	42	UCGUGCCAGAUGCGCGUUUACA	3'	101	-38.6	514851485148515	0.742307692307692	242	AAAAAGUGGGCAGUUGGGGCUCGUGCCAGAUGCGCGUUUACACGGGCCCUGAAUACUGUAAAUGCACUAUCUGGUACGACAUCUCUUCUGUCACUGUCACC
OK	72	246_c8144_g1_i1	candidate-miR8-5p	CAUCUUACCGGGCAGCAUUAGA	22	tca-miR8-5p	CAUCUUACCGGGCAGCAUUAGA	0	c8144_g1_i1	21	42	59	81	UAAUACUGUCAGGUAAAGAUGUC	5'	97	-33.1	402061855670103	0.848717948717949	280	UCGGAAGGAGUAUCUGUUCACAUCUUACCGGGCAGCAUUAGAUUAAAGUUGAAUCUUCUAAUACUGUCAGGUAAAGAUGUCGUCAGGAUUCCGAAAU
OK	73	258_c70837_g1_i1	candidate-miR71-5p	UGAAAGACAUGGGUAGUGAGAU	22	tca-miR71-5p	UGAAAGACAUGGGUAGUGAGAU	0	c70837_g1_i1	21	42	61	81	CUCACUACCUUGUCUUUCAUG	5'	101	-54.7	534653465346535	101296296296296	18	AUGCUGGGGUGAAUUCUGCGUGAAAGACAUGGGUAGUGAGAUGUCCUCGCGCACCUGCGUCUCACUACCUUGUCUUUCAUGCGGCGUUCGCUGAAGUCAAC
OK	74	261_c32014_g1_i1	candidate-miR279a-3p	UGACUAGAUCCACACUCAUUAA	22	tca-miR279a-3p	UGACUAGAUCCACACUCAUUAA	0	c32014_g1_i1	54	75	16	38	AGUGAGUGCUGGUCUAGUGCACA	3'	95	-40.2	463157894736842	0.913636363636364	1	GUCCUGGUUGUGCCGAGUGAGUGCUGGUCUAGUGCACAUUGAAAUUGACUCUGUGACUAGAUCCACACUCAUUAAGCACGUUCAGGUGUAAACAA
OK	75	266_c52255_g1_i3	candidate-miR184-3p	UGGACGGAGAACUGAUAAGGGC	22	tca-miR184-3p	UGGACGGAGAACUGAUAAGGGC	0	c52255_g1_i3	62	83	21	42	CCUUAUCAUUCUCCUGUCCGGU	3'	103	-42	543689320388349	0.75	142	AGAAAUUCGUGCCCGAAGUCCCUUAUCAUUCUCCUGUCCGGUGUACGAGCGUUUAGACAACUGGACGGAGAACUGAUAAGGGCCCGAGGGUCGCAGACUCGAC
OK	76	267_c52255_g1_i2	candidate-miR184-3p	UGGACGGAGAACUGAUAAGGGC	22	tca-miR184-3p	UGGACGGAGAACUGAUAAGGGC	0	c52255_g1_i2	62	83	21	42	CCUUAUCAUUCUCCUGUCCGGU	3'	103	-42	543689320388349	0.75	186	AGAAAUUCGUGCCCGAAGUCCCUUAUCAUUCUCCUGUCCGGUGUACGAGCGUUUAGACAACUGGACGGAGAACUGAUAAGGGCCCGAGGGUCGCAGACUCGAC
OK	77	268_c52255_g1_i1	candidate-miR184-3p	UGGACGGAGAACUGAUAAGGGC	22	tca-miR184-3p	UGGACGGAGAACUGAUAAGGGC	0	c52255_g1_i1	62	83	21	42	CCUUAUCAUUCUCCUGUCCGGU	3'	103	-42	543689320388349	0.75	142	AGAAAUUCGUGCCCGAAGUCCCUUAUCAUUCUCCUGUCCGGUGUACGAGCGUUUAGACAACUGGACGGAGAACUGAUAAGGGCCCGAGGGUCGCAGACUCGAC
OK	78	269_c50769_g1_i2	candidate-miR184-3p	UGGACGGAGAACUGAUAAGGGC	22	tca-miR184-3p	UGGACGGAGAACUGAUAAGGGC	0	c50769_g1_i2	62	83	21	42	CCUUAUCAUUCUCCUGUCCGGU	3'	103	-42	543689320388349	0.75	239	AGAAAUUCGUGCCCGAAGUCCCUUAUCAUUCUCCUGUCCGGUGUACGAGCGUUUAGACAACUGGACGGAGAACUGAUAAGGGCCCGAGGGUCGCAGACUCGAC
OK	79	270_c50769_g1_i1	candidate-miR184-3p	UGGACGGAGAACUGAUAAGGGC	22	tca-miR184-3p	UGGACGGAGAACUGAUAAGGGC	0	c50769_g1_i1	62	83	21	42	CCUUAUCAUUCUCCUGUCCGGU	3'	103	-42	543689320388349	0.75	190	AGAAAUUCGUGCCCGAAGUCCCUUAUCAUUCUCCUGUCCGGUGUACGAGCGUUUAGACAACUGGACGGAGAACUGAUAAGGGCCCGAGGGUCGCAGACUCGAC
Dicer	80	271_c46526_g1_i1	candidate-miR10-5p	UACCCUGUAGAUCCGAAUUUGU	22	tca-miR10-5p	UACCCUGUAGAUCCGAAUUUGU	0	c46526_g1_i1	21	42	58	2		5'	100	-37.9	43	0.881395348837209	87	CCCAGUUAAUGCUCUACAUCUACCCUGUAGAUCCGAAUUUGUUUGAUAAGAGGCGACAAAUUCGGUUCUAGAGAGGUUUGUGUGGUGCAUACAAUGCUAC
OK	81	273_c8144_g1_i1	candidate-miR8-3p	UAAUACUGUCAGGUAAAGAUGUC	23	tca-miR8-3p	UAAUACUGUCAGGUAAAGAUGUC	0	c8144_g1_i1	59	81	21	42	CAUCUUACCGGGCAGCAUUAGA	3'	101	-33.1	405940594059406	0.807317073170732	242	UCGGAAGGAGUAUCUGUUCACAUCUUACCGGGCAGCAUUAGAUUAAAGUUGAAUCUUCUAAUACUGUCAGGUAAAGAUGUCGUCAGGAUUCCGAAAUCAAC
Dicer	82	274_c47854_g1_i5	candidate-bantam-5p	CUGGUUUUCACAAUGAUUUGACAG	24	tca-bantam-5p	CUGGUUUUCACAGUGAUUUGACAG	1	c47854_g1_i5	21	44	59	2		5'	100	-33.1	38	0.871052631578947	18	ACUUGGCAGCAUAGACGAAACUGGUUUUCACAAUGAUUUGACAGAUGGAUAUGAUUCUGAGAUCAUUGUGAAAGCUGAUUUUGUUCAGAGAUCAUCUCGU
Dicer	83	275_c47854_g1_i4	candidate-bantam-5p	CUGGUUUUCACAAUGAUUUGACAG	24	tca-bantam-5p	CUGGUUUUCACAGUGAUUUGACAG	1	c47854_g1_i4	21	44	59	2		5'	100	-33.1	38	0.871052631578947	18	ACUUGGCAGCAUAGACGAAACUGGUUUUCACAAUGAUUUGACAGAUGGAUAUGAUUCUGAGAUCAUUGUGAAAGCUGAUUUUGUUCAGAGAUCAUCUCGU
Dicer	84	276_c47854_g1_i2	candidate-bantam-5p	CUGGUUUUCACAAUGAUUUGACAG	24	tca-bantam-5p	CUGGUUUUCACAGUGAUUUGACAG	1	c47854_g1_i2	21	44	59	2		5'	100	-33.1	38	0.871052631578947	18	ACUUGGCAGCAUAGACGAAACUGGUUUUCACAAUGAUUUGACAGAUGGAUAUGAUUCUGAGAUCAUUGUGAAAGCUGAUUUUGUUCAGAGAUCAUCUCGU
Dicer	85	277_c47854_g1_i1	candidate-bantam-5p	CUGGUUUUCACAAUGAUUUGACAG	24	tca-bantam-5p	CUGGUUUUCACAGUGAUUUGACAG	1	c47854_g1_i1	21	44	59	2		5'	100	-33.1	38	0.871052631578947	18	ACUUGGCAGCAUAGACGAAACUGGUUUUCACAAUGAUUUGACAGAUGGAUAUGAUUCUGAGAUCAUUGUGAAAGCUGAUUUUGUUCAGAGAUCAUCUCGU
OK	86	282_c69998_g1_i1	candidate-miR2a-3p	UAUCACAGCCAGCUUUGAUGAGC	23	tca-miR2a-3p	UAUCACAGCCAGCUUUGAUGAGC	0	c69998_g1_i1	57	79	21	41	UCACAAAGUGGCUGUUGUAUG	3'	99	-43.1	525252525252525	0.828846153846154	159	AGAGUCGGUGUGCGCGCUGCUCACAAAGUGGCUGUUGUAUGCAGAUUUUCGAGUCAUAUCACAGCCAGCUUUGAUGAGCGACGCGACAUCCCAGCAUCA
OK	87	286_c39545_g1_i5	candidate-miR281-3p	UGUCAUGGAGUUGCUCUCUUU	21	tca-miR281-3p	UGUCAUGGAGUUGCUCUCUUU	0	c39545_g1_i5	59	79	21	41	AGAGAGCUAUCCAUCGACAGU	3'	99	-47.8	454545454545455	106222222222222	242	AAAAAAGGCGAGCGCUACGAAGAGAGCUAUCCAUCGACAGUAUGGUAAUGAUUGACACUGUCAUGGAGUUGCUCUCUUUGUGGACGCCGCUUAAUACAA
OK	88	287_c39545_g1_i3	candidate-miR281-3p	UGUCAUGGAGUUGCUCUCUUU	21	tca-miR281-3p	UGUCAUGGAGUUGCUCUCUUU	0	c39545_g1_i3	59	79	21	41	AGAGAGCUAUCCAUCGACAGU	3'	99	-47.8	454545454545455	106222222222222	242	AAAAAAGGCGAGCGCUACGAAGAGAGCUAUCCAUCGACAGUAUGGUAAUGAUUGACACUGUCAUGGAGUUGCUCUCUUUGUGGACGCCGCUUAAUACAA
OK	89	288_c39545_g1_i1	candidate-miR281-3p	UGUCAUGGAGUUGCUCUCUUU	21	tca-miR281-3p	UGUCAUGGAGUUGCUCUCUUU	0	c39545_g1_i1	59	79	21	41	AGAGAGCUAUCCAUCGACAGU	3'	99	-47.8	454545454545455	106222222222222	242	AAAAAAGGCGAGCGCUACGAAGAGAGCUAUCCAUCGACAGUAUGGUAAUGAUUGACACUGUCAUGGAGUUGCUCUCUUUGUGGACGCCGCUUAAUACAA
OK	90	289_c37926_g1_i1	candidate-miR281-3p	UGUCAUGGAGUUGCUCUCUUU	21	tca-miR281-3p	UGUCAUGGAGUUGCUCUCUUU	0	c37926_g1_i1	59	79	21	41	AGAGAGCUAUCCAUCGACAGU	3'	99	-47.8	454545454545455	106222222222222	242	AAAAAAGGCGAGCGCUACGAAGAGAGCUAUCCAUCGACAGUAUGGUAAUGAUUGACACUGUCAUGGAGUUGCUCUCUUUGUGGACGCCGCUUAAUACAA

## Sheet: mirnaList
mirnaID	mirnaSeq	pre-mirnaSeq	index	homolog-mirnaID	homolog-mirnaSeq
miR-8-5p-1	CAUCUUACCGGGCAGCAUUAGA	UCGGAAGGAGUAUCUGUUCACAUCUUACCGGGCAGCAUUAGAUUAAAGUUGAAUCUUCUAAUACUGUCAGGUAAAGAUGUCGUCAGGAUUCCGAAAU	16	bmo-miR8-5p	UAAUACUGUCAGGUAAAGAUGUC
miR-279-3p-1	UGACUAGAUCCACACUCAUUAA	GUCCUGGUUGUGCCGAGUGAGUGCUGGUCUAGUGCACAUUGAAAUUGACUCUGUGACUAGAUCCACACUCAUUAAGCACGUUCAGGUGUAAACAA	32	cqu-miR279-3p	AGUGAGUGCUGGUCUAGUGCACA
miR-bantam-3p-1	UGAGAUCAUUGUGAAAGCUGA	UUGGCAGCAUAGACGAAACUGGUUUUCACAAUGAUUUGACAGAUGGAUAUGAUUCUGAGAUCAUUGUGAAAGCUGAUUUUGUUCAGAGAUCAUCUC	23	cqu-bantam-3p	GGUUUUCACAAUGAUUUGACAGA
miR-281-5p-1	AAGAGAGCUAUCCAUCGACAGU	GAAAAAAGGCGAGCGCUACGAAGAGAGCUAUCCAUCGACAGUAUGGUAAUGAUUGACACUGUCAUGGAGUUGCUCUCUUUGUGGACGCCGCUUAAUACAAC	12	bmo-miR281-5p	UGUCAUGGAGUUGCUCUCUUUG
miR-10-5p-1	ACCCUGUAGAUCCGAAUUUGUU	CCAGUUAAUGCUCUACAUCUACCCUGUAGAUCCGAAUUUGUUUGAUAAGAGGCGACAAAUUCGGUUCUAGAGAGGUUUGUGUGGUGCAUACAAU	38	cqu-miR10-5p	CAAAUUCGGUUCUAGAGAGGUUU
miR-277-3p-1	UAAAUGCACUAUCUGGUACGACA	AAAAAGUGGGCAGUUGGGGCUCGUGCCAGAUGCGCGUUUACACGGGCCCUGAAUACUGUAAAUGCACUAUCUGGUACGACAUCUCUUCUGUCACUGUCACC	1	ame-miR277	UCGUGCCAGAUGCGCGUUUACA
miR-281-3p-1	UGUCAUGGAGUUGCUCUCUUUGU	UGAAAAAAGGCGAGCGCUACGAAGAGAGCUAUCCAUCGACAGUAUGGUAAUGAUUGACACUGUCAUGGAGUUGCUCUCUUUGUGGACGCCGCUUAAUACAACG	44	dme-miR281-3p	GAAGAGAGCUAUCCAUCGACAGU
miR-10-5p-2	ACCCUGUAGAUCCGAAUUUGU	CCAGUUAAUGCUCUACAUCUACCCUGUAGAUCCGAAUUUGUUUGAUAAGAGGCGACAAAUUCGGUUCUAGAGAGGUUUGUGUGGUGCAUACAAU	7	bmo-miR10-5p	AAAUUCGGUUCUAGAGAGGUUU
miR-281-3p-2	UGUCAUGGAGUUGCUCUCUUU	AAAAAAGGCGAGCGCUACGAAGAGAGCUAUCCAUCGACAGUAUGGUAAUGAUUGACACUGUCAUGGAGUUGCUCUCUUUGUGGACGCCGCUUAAUACAA	87	tca-miR281-3p	AGAGAGCUAUCCAUCGACAGU
miR-2-3p-1	UAUCACAGCCAGCUUUGAUGAGC	AGAGUCGGUGUGCGCGCUGCUCACAAAGUGGCUGUUGUAUGCAGAUUUUCGAGUCAUAUCACAGCCAGCUUUGAUGAGCGACGCGACAUCCCAGCAUCA	21	bmo-miR2a-3p	UCACAAAGUGGCUGUUGUAUG
miR-184-3p-1	UGGACGGAGAACUGAUAAGGGC	AGAAAUUCGUGCCCGAAGUCCCUUAUCAUUCUCCUGUCCGGUGUACGAGCGUUUAGACAACUGGACGGAGAACUGAUAAGGGCCCGAGGGUCGCAGACUCGAC	56	dme-miR184-3p	CCUUAUCAUUCUCCUGUCCGGU
miR-71-5p-1	UGAAAGACAUGGGUAGUGAGAU	AUGCUGGGGUGAAUUCUGCGUGAAAGACAUGGGUAGUGAGAUGUCCUCGCGCACCUGCGUCUCACUACCUUGUCUUUCAUGCGGCGUUCGCUGAAGUCAAC	73	tca-miR71-5p	CUCACUACCUUGUCUUUCAUG
miR-87-3p-1	GUGAGCAAAGUUUCAGGUGUG	CAUCCUGGGCUAUACUCUUACGCCUGAAAUUUGCUUUUGACCUGGCCAUACGUGCACUCGUUAAUUGAGUUUUAUUGCAAAAAGGUGAGCAAAGUUUCAGGUGUGUGAGGGCGCCUGGGCUACAA	63	tca-miR87a-3p	CGCCUGAAAUUUGCUUUUGACCU
miR-14-3p-1	UCAGUCUUUUUCUCUCUCCUAU	CUUUCGGUCGCUGGGUCAGUGGGGGUGAGAAAUGGACUCGGCUAUAUUUAUGUAACAGUCAGUCUUUUUCUCUCUCCUAUCGGCCCUACGGCAUAUCGUC	39	dme-miR14-3p	GGGGGUGAGAAAUGGACUCGGCU
miR-8-3p-1	UAAUACUGUCAGGUAAAGAUGU	CGGAAGGAGUAUCUGUUCACAUCUUACCGGGCAGCAUUAGAUUAAAGUUGAAUCUUCUAAUACUGUCAGGUAAAGAUGUCGUCAGGAUUCCGAAAUCAA	37	cqu-miR8-3p	AUCUUACCGGGCAGCAUUAGA
miR-14-3p-2	UCAGUCUUUUUCUCUCUCCUA	UUUCGGUCGCUGGGUCAGUGGGGGUGAGAAAUGGACUCGGCUAUAUUUAUGUAACAGUCAGUCUUUUUCUCUCUCCUAUCGGCCCUACGGCAUAUCGU	2	bmo-miR14-3p	GGGGUGAGAAAUGGACUCGGCU
miR-8-3p-2	UAAUACUGUCAGGUAAAGAUGUC	UCGGAAGGAGUAUCUGUUCACAUCUUACCGGGCAGCAUUAGAUUAAAGUUGAAUCUUCUAAUACUGUCAGGUAAAGAUGUCGUCAGGAUUCCGAAAUCAAC	17	bmo-miR8-3p	CAUCUUACCGGGCAGCAUUAGA
miR-281-3p-3	ACUGUCAUGGAGUUGCUCUCUU	AAAAAGGCGAGCGCUACGAAGAGAGCUAUCCAUCGACAGUAUGGUAAUGAUUGACACUGUCAUGGAGUUGCUCUCUUUGUGGACGCCGCUUAAUACA	8	bmo-miR281-3p	GAGAGCUAUCCAUCGACAGUAU

## Sheet: SumirLocate
summary premirna locations
mirnaID	index	readID	premirna location	premirna length	strand	annotation	exp3	exp8	f	m	l
miR-10-5p-1	38	c46526_g1_i1	1535	94	ANTISENSE	lnc	1	1	0	1	1
miR-10-5p-2	7	c46526_g1_i1	1535	94	ANTISENSE	lnc	1	1	0	1	1
miR-14-3p-1	39	c106582_g1_i1	50	100	SENSE	lnc	1	1	0	1	0
miR-14-3p-2	2	c106582_g1_i1	51	98	SENSE	lnc	1	1	0	1	0
miR-184-3p-1	56	c50769_g1_i1	2931	103	ANTISENSE	coding	1	1	1	1	0
miR-184-3p-1	56	c50769_g1_i2	2930	103	ANTISENSE	coding	1	1	1	1	0
miR-184-3p-1	56	c52255_g1_i1	141	103	SENSE	coding	1	1	1	1	1
miR-184-3p-1	56	c52255_g1_i2	185	103	SENSE	coding	1	1	1	1	1
miR-184-3p-1	56	c52255_g1_i3	141	103	SENSE	coding	1	1	0	0	1
miR-2-3p-1	21	c69998_g1_i1	158	99	SENSE	lnc	0	1	0	0	0
miR-277-3p-1	1	c56368_g2_i1	97	101	ANTISENSE	ND	1	1	0	0	1
miR-279-3p-1	32	c32014_g1_i1	398	95	ANTISENSE	lnc	0	1	0	0	0
miR-281-3p-1	44	c37926_g1_i1	1148	103	ANTISENSE	ND	1	1	0	1	1
miR-281-3p-1	44	c39545_g1_i1	738	103	SENSE	ND	1	1	0	1	0
miR-281-3p-1	44	c39545_g1_i3	650	103	SENSE	ND	0	1	0	0	0
miR-281-3p-1	44	c39545_g1_i5	738	103	SENSE	ND	0	1	0	0	0
miR-281-3p-2	87	c37926_g1_i1	1150	99	ANTISENSE	ND	1	1	0	1	1
miR-281-3p-2	87	c39545_g1_i1	740	99	SENSE	ND	1	1	0	1	0
miR-281-3p-2	87	c39545_g1_i3	652	99	SENSE	ND	0	1	0	0	0
miR-281-3p-2	87	c39545_g1_i5	740	99	SENSE	ND	0	1	0	0	0
miR-281-3p-3	8	c37926_g1_i1	1151	97	ANTISENSE	ND	1	1	0	1	1
miR-281-3p-3	8	c39545_g1_i1	741	97	SENSE	ND	1	1	0	1	0
miR-281-3p-3	8	c39545_g1_i3	653	97	SENSE	ND	0	1	0	0	0
miR-281-3p-3	8	c39545_g1_i5	741	97	SENSE	ND	0	1	0	0	0
miR-281-5p-1	12	c37926_g1_i1	1149	101	ANTISENSE	ND	1	1	0	1	1
miR-281-5p-1	12	c39545_g1_i1	739	101	SENSE	ND	1	1	0	1	0
miR-281-5p-1	12	c39545_g1_i3	651	101	SENSE	ND	0	1	0	0	0
miR-281-5p-1	12	c39545_g1_i5	739	101	SENSE	ND	0	1	0	0	0
miR-bantam-3p-1	23	c47854_g1_i1	2007	96	ANTISENSE	ND	0	0	0	0	0
miR-bantam-3p-1	23	c47854_g1_i2	933	96	ANTISENSE	ND	1	1	0	0	1
miR-bantam-3p-1	23	c47854_g1_i4	2122	96	ANTISENSE	ND	0	0	0	0	0
miR-bantam-3p-1	23	c47854_g1_i5	2430	96	ANTISENSE	ND	0	1	0	0	0
miR-71-5p-1	73	c70837_g1_i1	17	101	SENSE	lnc	0	1	0	0	0
miR-8-3p-1	37	c8144_g1_i1	1210	99	SENSE	lnc	0	1	0	0	0
miR-8-3p-2	17	c8144_g1_i1	1209	101	SENSE	lnc	0	1	0	0	0
miR-8-5p-1	16	c8144_g1_i1	1209	97	SENSE	lnc	0	1	0	0	0
miR-87-3p-1	63	c48274_g1_i1	1522	125	ANTISENSE	ND	0	1	0	0	0
miR-87-3p-1	63	c48274_g1_i2	1522	125	ANTISENSE	ND	1	1	0	0	1
									4	16	12

## Sheet: SumirCount
mirna family	on SENSE	on ANTISENSE	total
miR-10	0	2	2
miR-14	2	0	2
miR-184	3	2	5
miR-2	1	0	1
miR-277	0	1	1
miR-279	0	1	1
miR-281	12	4	16
miR-bantam	0	4	4
miR-71	1	0	1
miR-8	3	0	3
miR-87	0	2	2
	22	16	38
